# Supplementary material for: Principles of meiotic chromosome assembly revealed in S. cerevisiae
Source: PubMed Central journal article supplement (PMC6805904; doi:10.1038/s41467-019-12629-0), 2019-10-22
Supplement: 41467_2019_12629_MOESM2_ESM.pdf [file 41467_2019_12629_MOESM2_ESM.pdf]

**Supplementary information for:**

**Principles of Meiotic Chromosome Assembly  
Revealed in *Saccharomyces cerevisiae***

**Schalbetter, Fudenberg et al. 2019**

Supplementary Figures 1-6  
Supplementary Tables 1-3

# Supplementary Figure 1

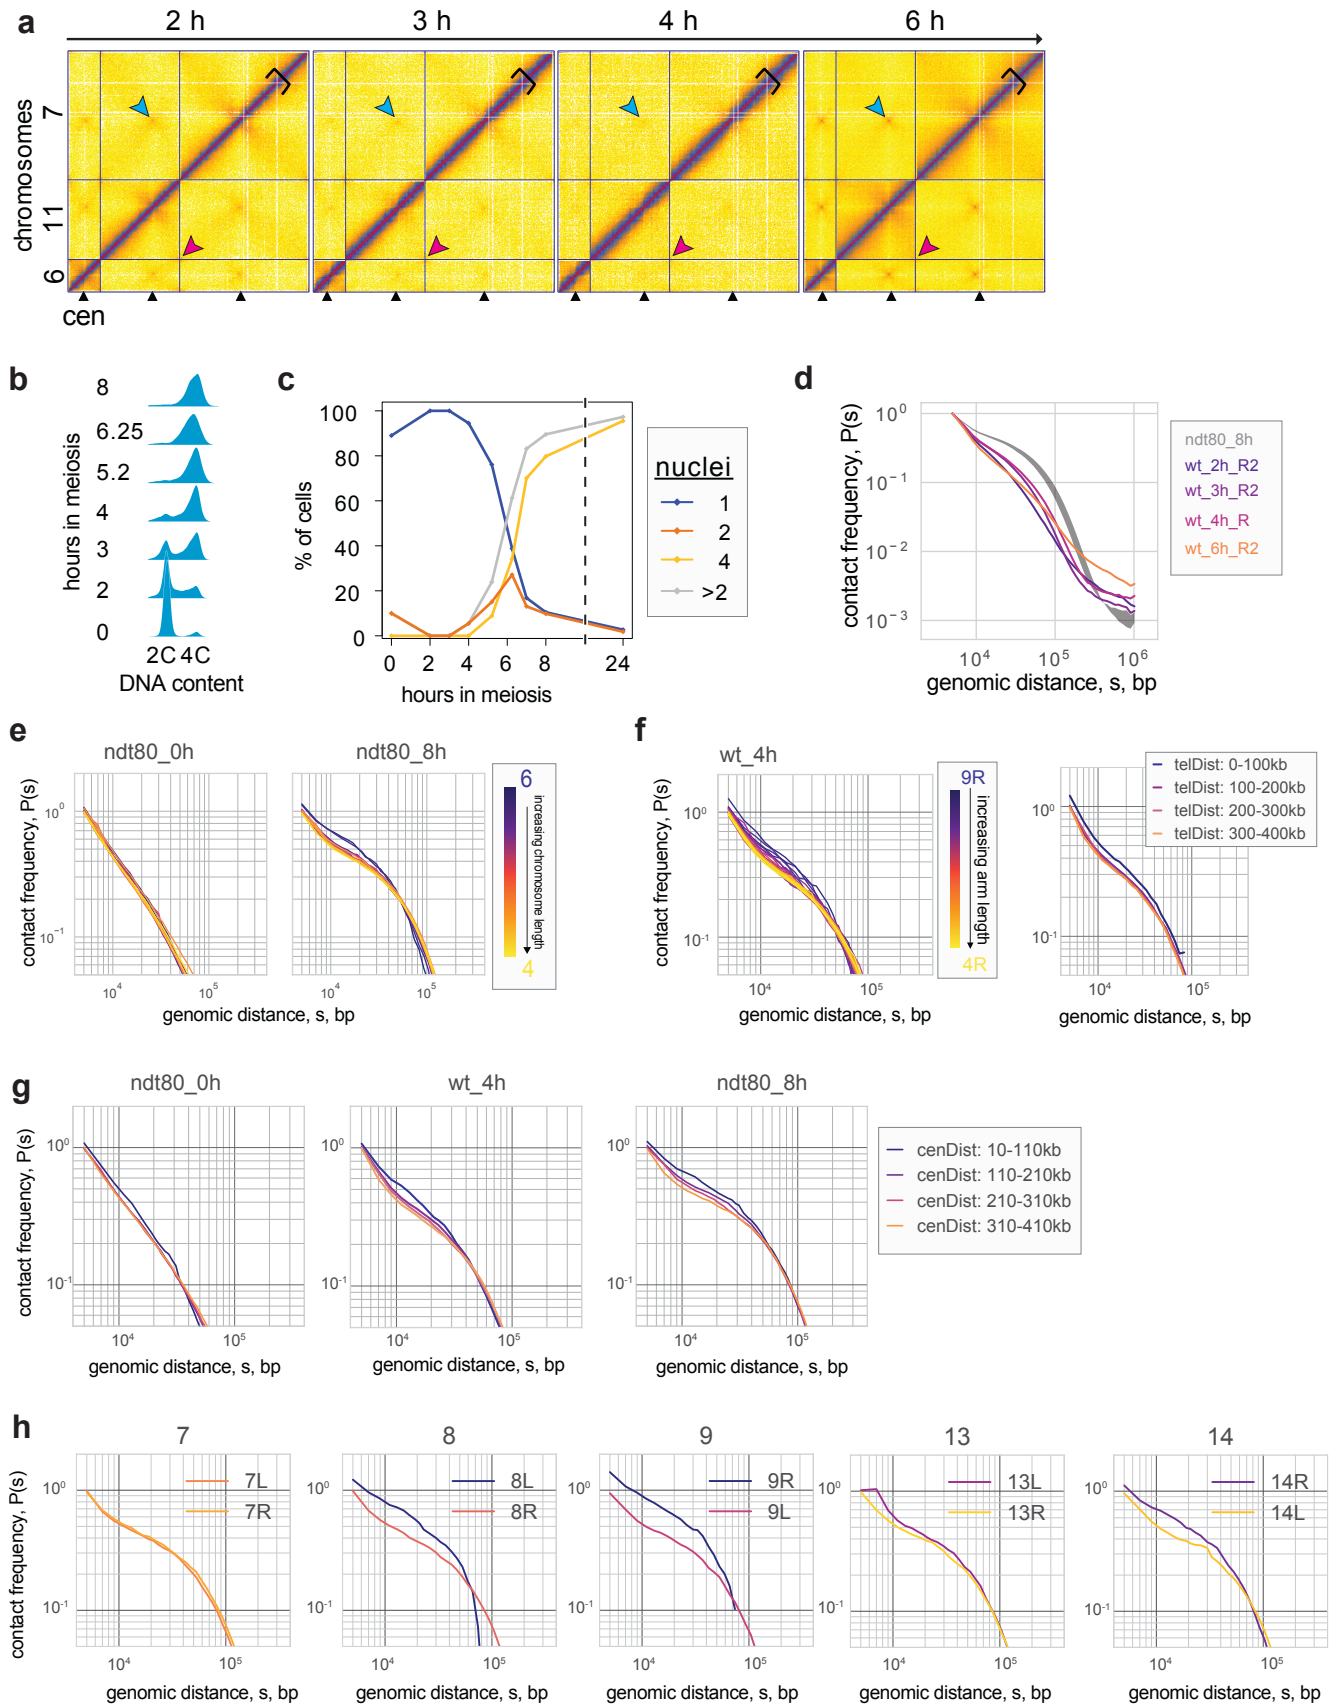

**Supplementary Figure 1. Temporal and chromosome length-specific analysis of meiotic chromatin conformation**  
**a-d.** Results from a replicate timecourse, collected and characterized independently of the timecourse in Fig. 1. **a.** Hi-C maps, plotted as in Fig. 1a. **b.** FACS to monitor meiotic DNA replication as in Fig. 1b. **c.** DAPI used to monitor meiotic nuclear divisions as in Fig. 1c. Source data are provided as a Source Data file. **d.**  $P(s)$  used to assess chromosome compaction as in Fig. 1e. **e.**  $P(s)$  for chromosomes stratified by size for *ndt80* $\Delta$  0 h, *ndt80* $\Delta$  8 h. Short chromosomes display relatively elevated  $P(s)$  at short distances, and an earlier shoulder. **f.** *Left:*  $P(s)$  for individual chromosome arms, stratified by size for wild type 4 h. Short arms display relatively elevated  $P(s)$  at short distances, and an earlier roll-over. *Right:* Intra-arm  $P(s)$  stratified by the distance from the telomere for wild type 4 h, averaged across all chromosomes. Telomere-proximal regions display elevated  $P(s)$  at short distances. **g.** Intra-arm  $P(s)$  stratified by the distance from the centromere for G1 (*ndt80* $\Delta$  0 h), wild type 4 h, *ndt80* $\Delta$  8 h, averaged across all chromosomes. **h.** Contact probability over genomic distance,  $P(s)$ , of single chromosome arms for *ndt80* $\Delta$  8 h.

## Supplementary Figure 2

### a Trans cen-cen

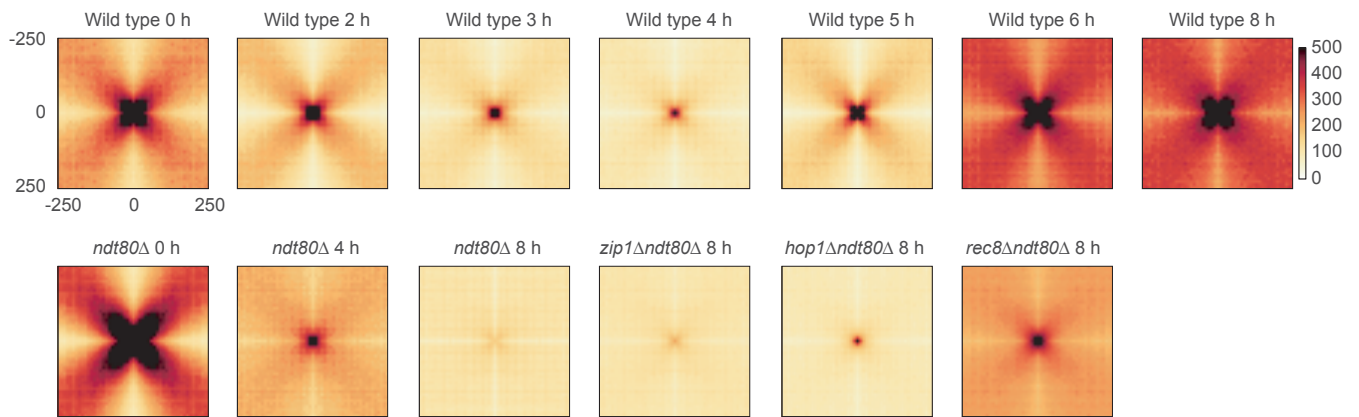

### b Cis cen

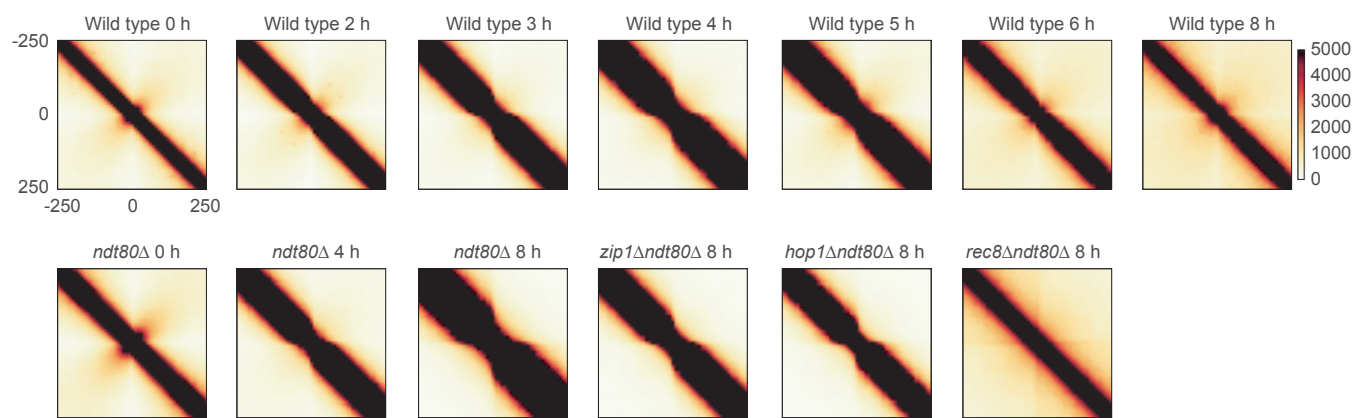

### c Cis/Total

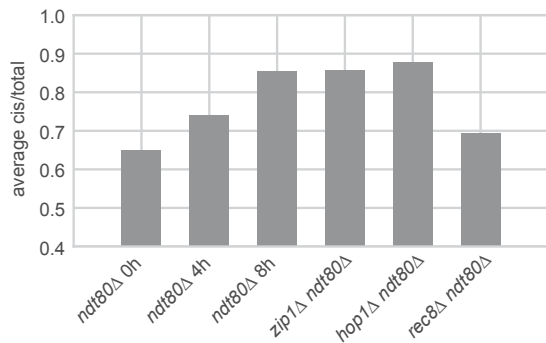

### d Monitoring of DNA content

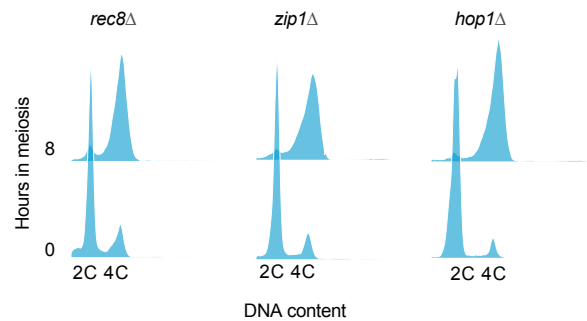

## Supplementary Figure 2. Aggregate analysis of centromeric interactions in meiosis

**a.** Average *trans* centromere-centromere contact maps for indicated data sets. Note that elevated centromere-centromere interactions in *ndt80*Δ as compared to wild type cells are most likely due to technical reasons in cell culture and not a biological effect due to *ndt80*Δ, which is not relevant for vegetative growth<sup>28</sup>. **b.** Average *cis* centromere-centromere contact maps for indicated data sets. Note the loss of the folding back in meiosis, and how the intra-arm enrichment is insulated at centromeres in meiosis. **c.** Average cis/total contact frequency, as in Fig. 1d. **d.** FACS analysis for monitoring meiotic DNA replication as in Fig. 1b.

# Supplementary Figure 3

## a Trans tel-tel

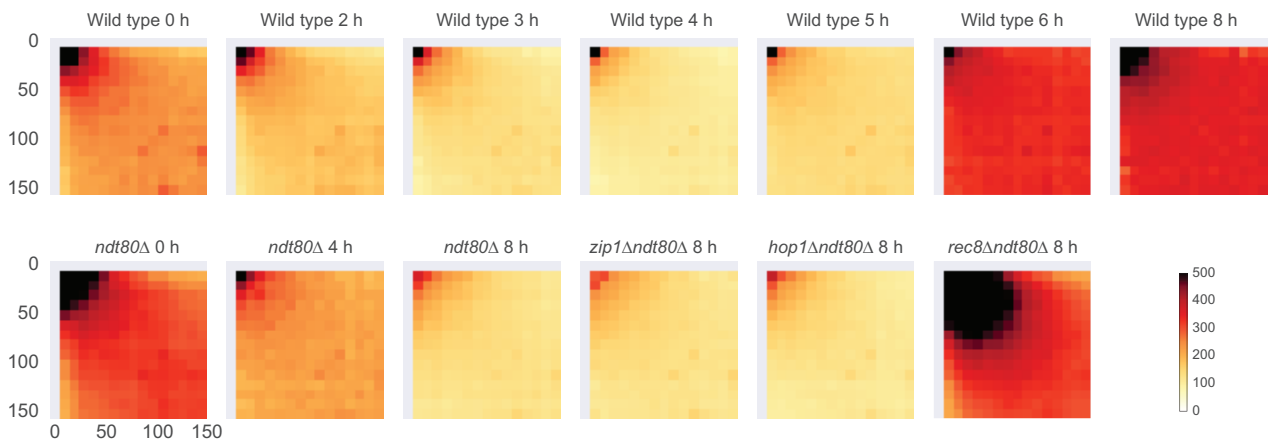

## b Cis tel-tel

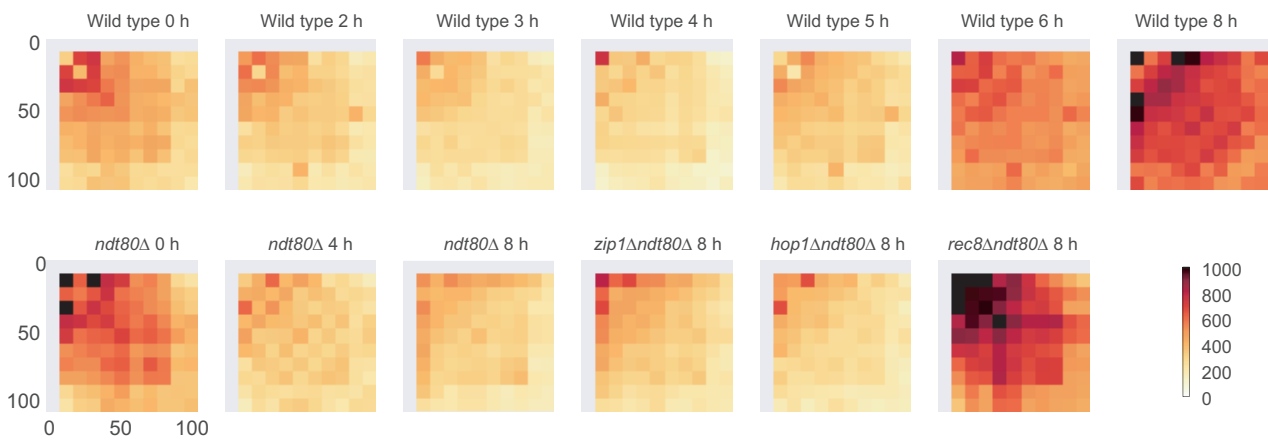

## c Cis-arm tel

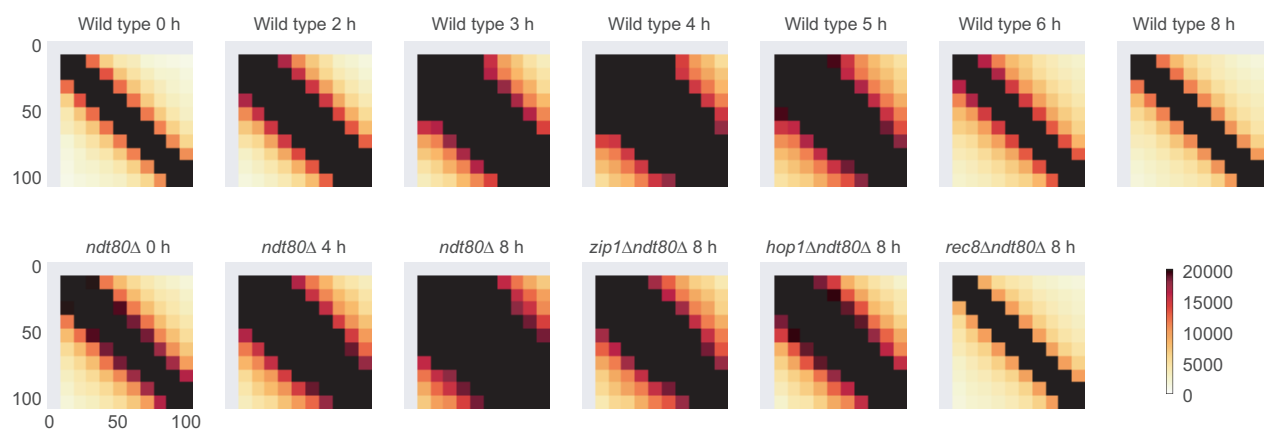

### Supplementary Figure 3. Aggregate analysis of telomeric interactions in meiosis

a. Average *trans* telomere-telomere contact maps for indicated datasets.

b. Average telomere-telomere contact maps between the two telomeres of the same chromosome.

c. Average contact map around each telomere in *cis*.

## Supplementary Figure 4

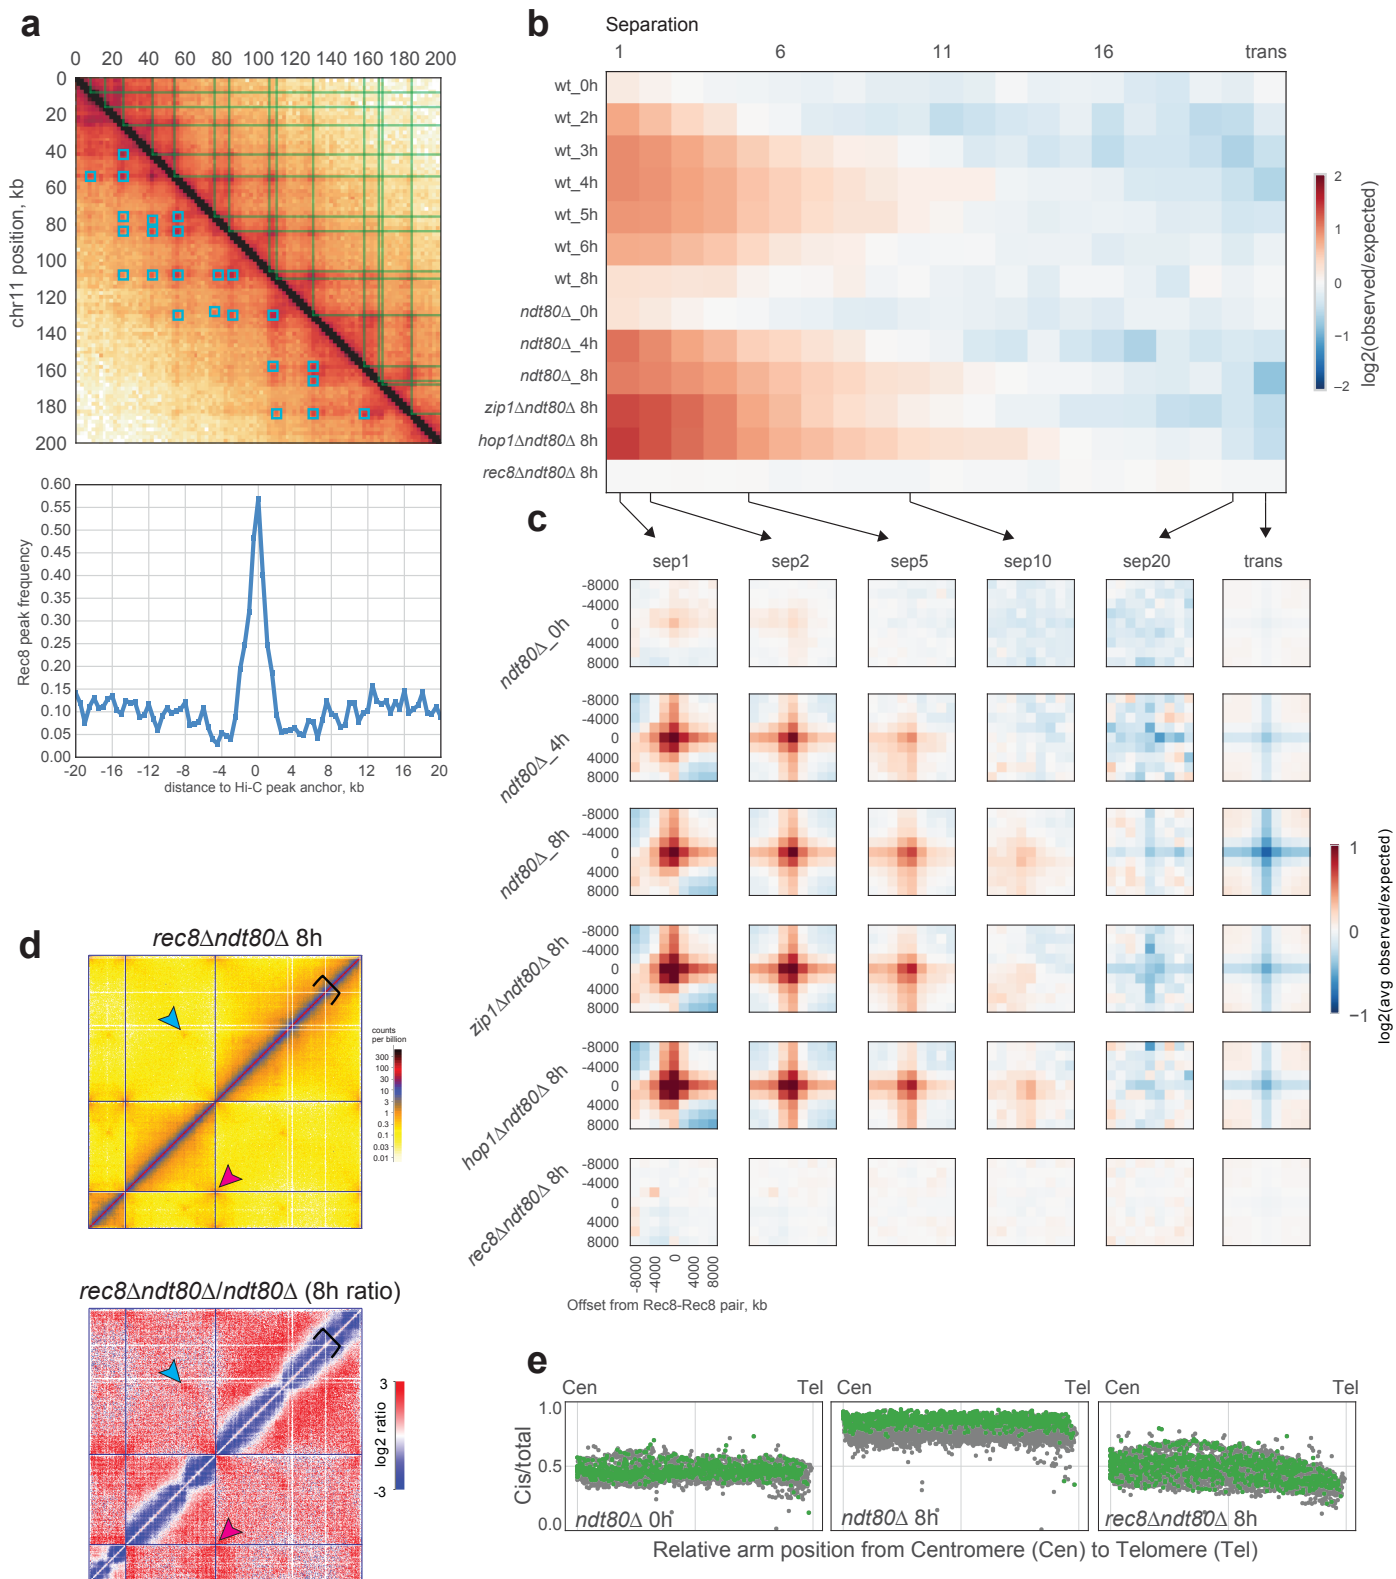

### Supplementary Figure 4. Preferred sites of Rec8 occupancy define sites of locus-specific interaction

**a.** To confirm the correspondence between the pattern of Rec8 binding and Hi-C peaks in meiosis, we performed a reciprocal enrichment analysis. Briefly, we called peaks using the call-dots command line tool in the *cooltools* package (Methods), and aggregated Rec8 ChIP peaks around Hi-C peak anchors. As many Hi-C peaks have shared starting or end points, this calculation used a set of unique anchors to avoid double counting. *Top:* 200kb region of chr11 *ndt80Δ* 8h, overlaid with positions of called Hi-C peaks (blue dots) and rec8 sites (green lines). *Bottom:* Frequency of Rec8 sites around Hi-C anchors, using 500bp bin size. **b.** Log<sub>2</sub> observed over expected contact frequency at Rec8-Rec8 peak pairs as a function of separation across datasets. **c.** Log<sub>2</sub> observed over expected contact frequency  $\pm 8$  kb around Rec8-Rec8 peak pairs at the indicated separations. Together, **b-c** demonstrate that Rec8-Rec8 enrichments are strongest between adjacent sites, decrease between non-adjacent sites with increasing genomic separation, and are absent in *trans*. Equally important, these meiotic features are lost in *rec8Δ*. As for mammalian interphase, this observation in meiosis argues for a *cis*-acting process underlying the formation of focal interactions between Rec8 sites. **d. Left:** Hi-C contact maps for *rec8Δndt80Δ*. Chromosomes 6, 11 and 7 are shown as representatives for the whole genome. *Right:* Log<sub>2</sub> Hi-C ratio maps of *rec8Δndt80Δ* / *ndt80Δ*. Plotted as in Fig. 1g. **e.** *cis*/total as a function of distance along the chromosomal arm, Rec8 sites marked in green.

## Supplementary Figure 5

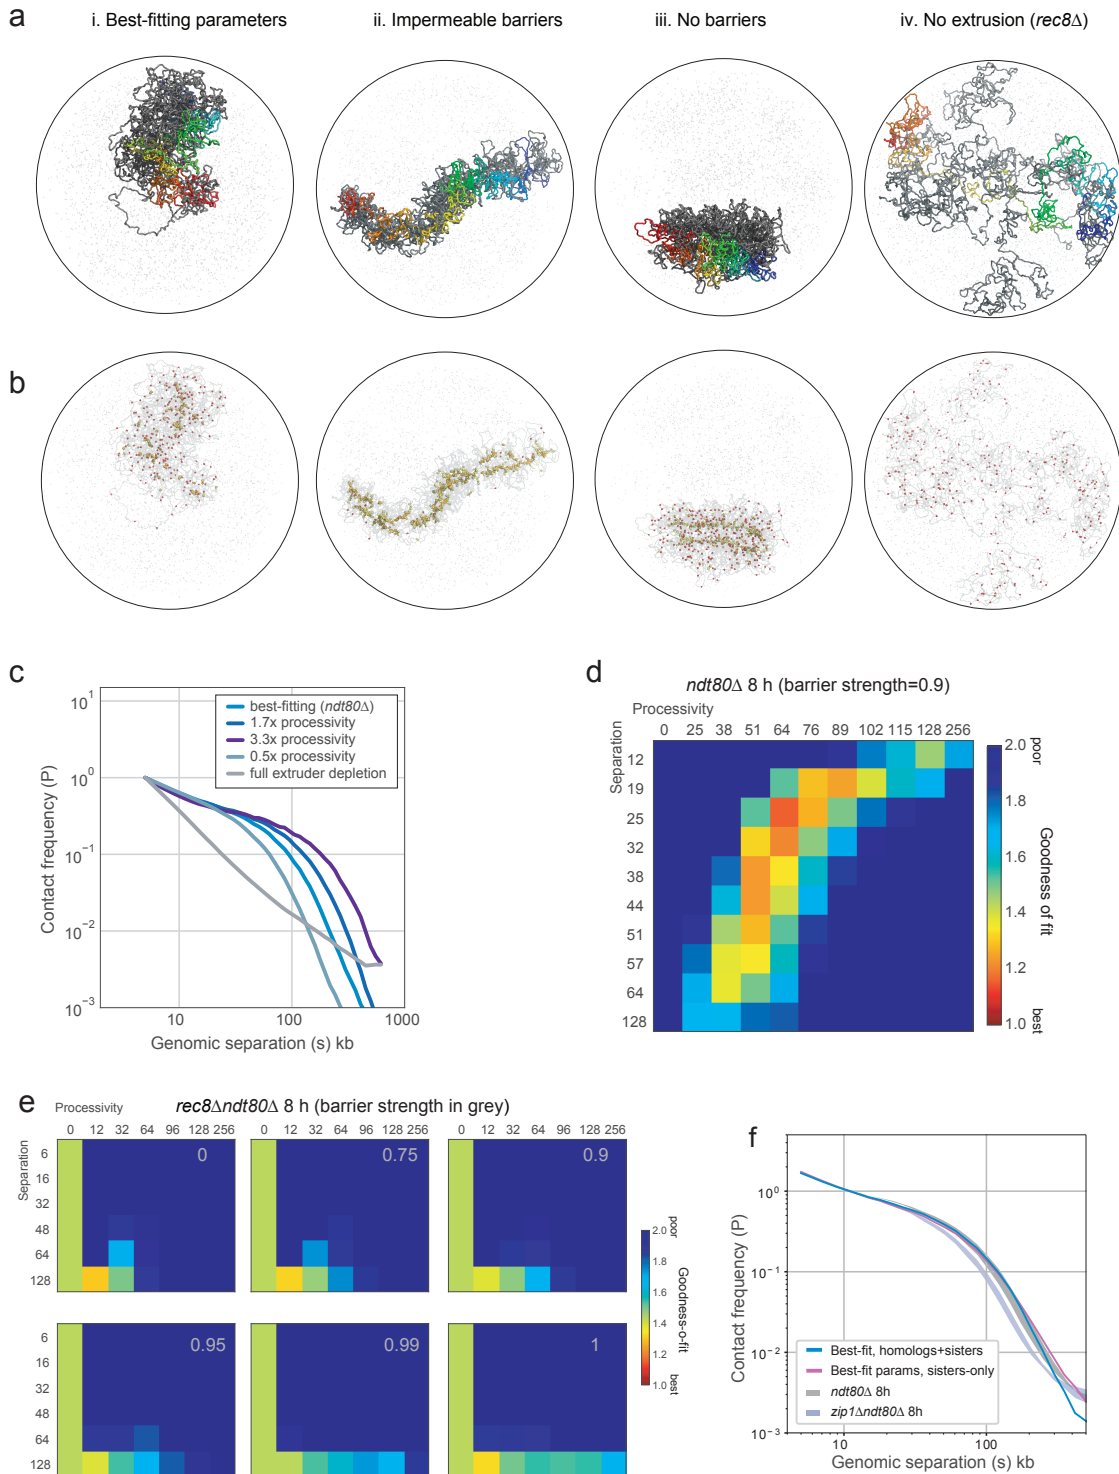

### Supplementary Figure 5. Polymer simulations of loop extrusion reveal best-fitting parameters and conformations

**a.** Representative conformation for the indicated parameter sets. As in Fig. 4a, one chromatid from a homologous quartet of chromatids colored from start to end according to the spectrum; other three colored in grey. **b.** For the same four conformations, positions of Rec8 sites indicated with red spheres, positions of extruded loop bases in yellow, and extruders overlapping a Rec8 site in orange. Note the stable loops between neighboring Rec8 sites creates a very elongated chromatid (ii). Also note the majority of Rec8 sites are unoccupied in (iii), despite the self-assembly of two axial cores and a strong brush. Finally, note very dispersed chromosomes in (iv), consistent with EM<sup>3</sup> for *rec8Δ*. **c.** Contact frequency versus distance,  $P(s)$ , for indicated simulations. Note that the loss of the shoulder in  $P(s)$  in the case of full extruder depletion mirrors the difference between experimental *ndt80Δ* and *rec8Δ* Hi-C maps. Simulations with increased processivity predict that  $P(s)$  would shift rightward if unloading was impaired, as could happen in *waplΔ*. Conversely, if unloading was enhanced, simulations with decreased processivity indicate a leftward shift in  $P(s)$ , until the absence of extruders. **d.** Goodness-of-fit for a fine grid of processivity versus separation at barrier strength 0.90. The best-fit occurs at similar processivity and separation as for barrier strength 0.95 shown in Fig. 3c, but with slightly lower goodness-of-fit. **e.** Goodness-of-fit to *rec8Δ* data for simulations with the indicated barrier strengths (in grey: 0.00, 0.75, 0.90, 0.95, 0.99, 1.00) over coarse grids of processivity and separation demonstrates that the best fits have few if any extruded loops, regardless of barrier strength. Note that parameters in best agreement with experimental *ndt80Δ* Hi-C data fit the experimental *rec8Δ* Hi-C data poorly (Average log(fold deviation) $>2$ ). **f.**  $P(s)$  curves for simulations with sisters and homologues with the best-fitting parameters for *ndt80Δ-8h* maps compared to  $P(s)$  for simulations with sisters only show that simply removing homologue tethering does not recapitulate the sort of shifted  $P(s)$  seen experimentally in *zip1Δ* Hi-C.

## Supplementary Figure 6

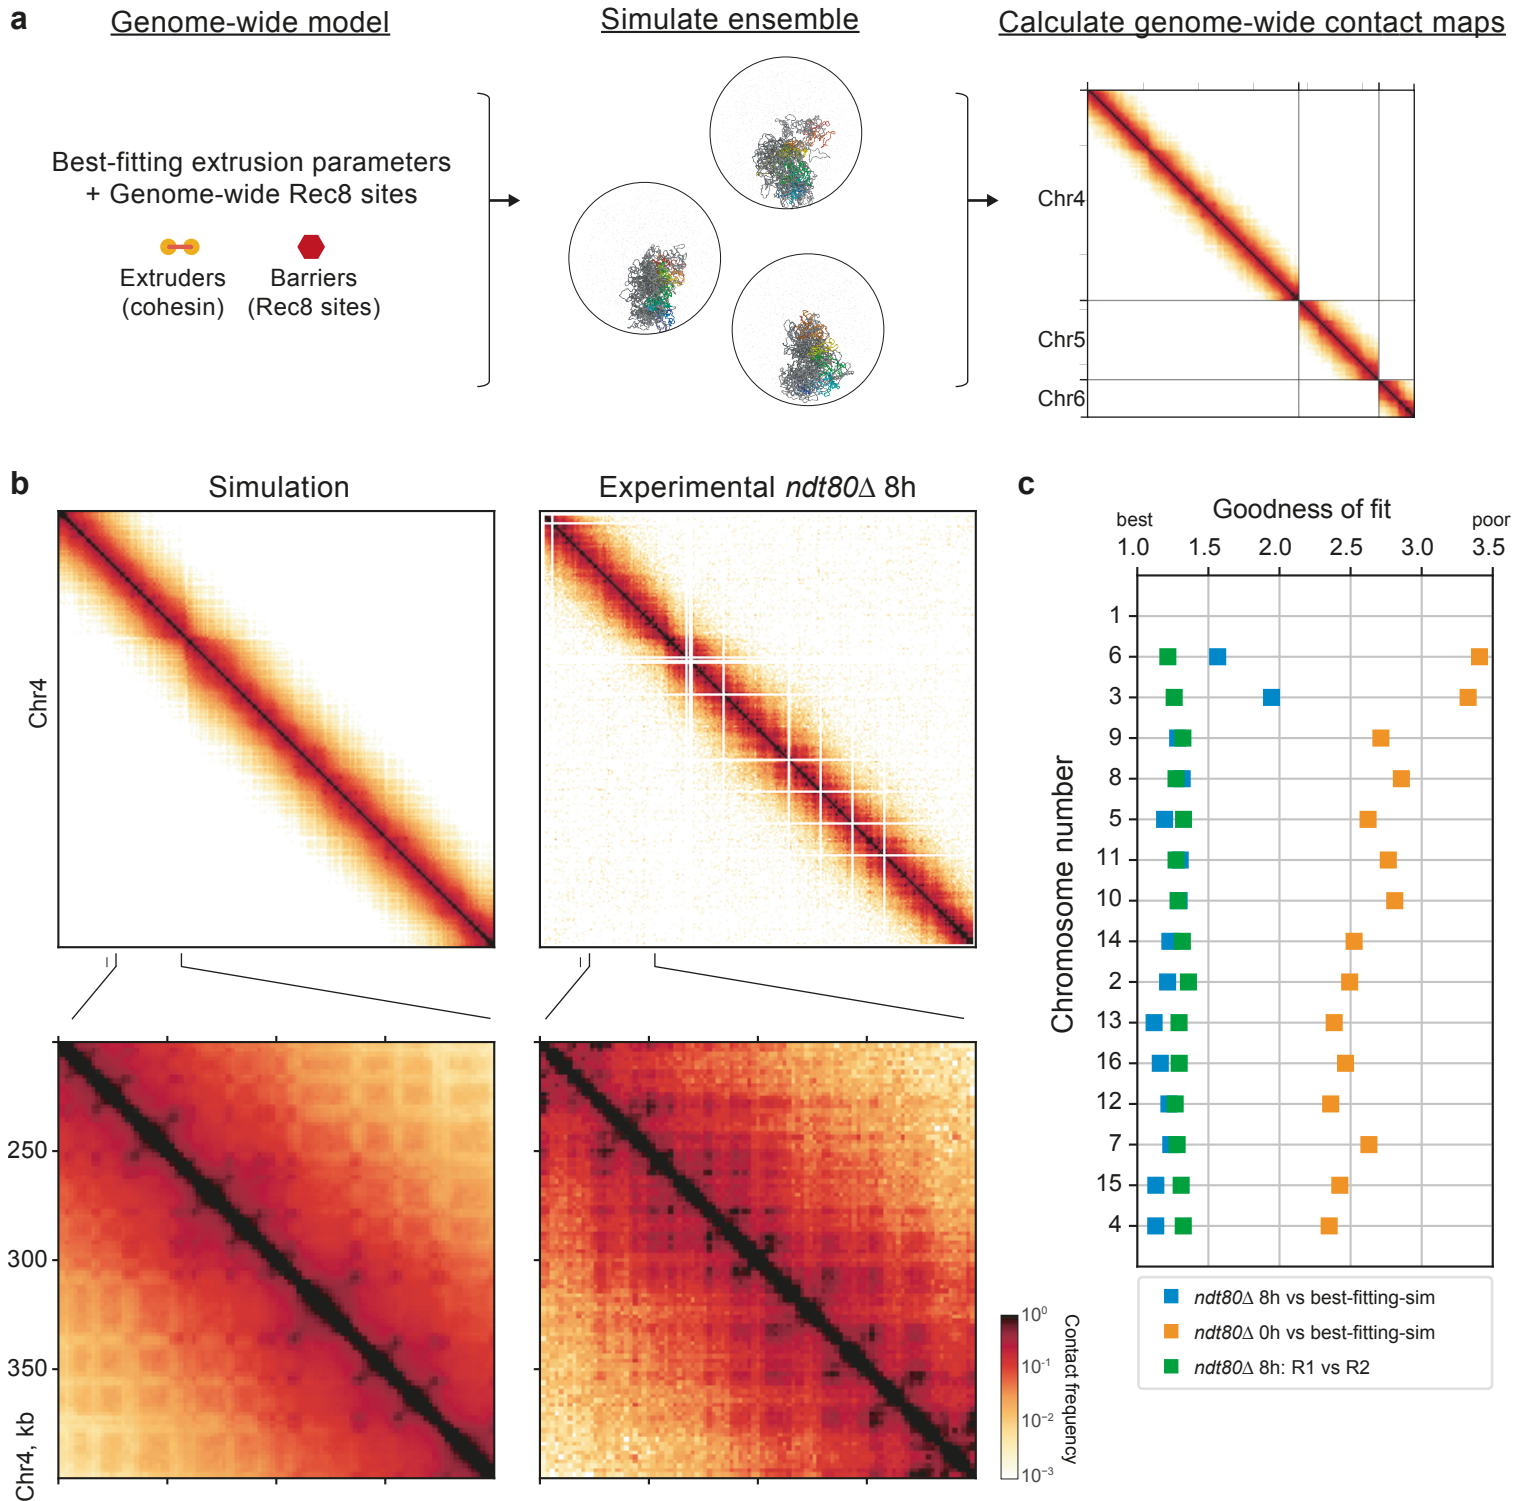

### Supplementary Figure 6. Genome-wide simulations of loop extrusion with the best-fitting parameters.

**a.** To test the transferability of our model across chromosomes, we ran simulations for best-fitting loop extrusion parameters found for chromosome 13 for the full genome, representing each chromosome as a polymer fibre and taking positions of barriers for Rec8 sites across the genome (*left*). Using these parameters we simulated an ensemble of conformations (*middle*) and calculated genome-wide heatmaps at 2 kb resolution (*right*). **b.** Contact maps for chromosome 4 and for a zoomed 200 kb region of chromosome 4 for simulations (*left*) and experimental data (*right*). **c.** Goodness-of-fit on a per-chromosome basis, with chromosomes ordered by length, calculated as previously in Fig. 3 for chromosome 13. Blue dots show the goodness-of-fit for simulations versus combined experimental *ndt80Δ* 8 h replicates, green dots show the goodness-of-fit for replicates, and orange dots show goodness-of-fit between meiotic simulations and G1 data. Note that as for other analyses, chromosome 1 was excluded as few informative bins remained after filtering. Also note that the shortest chromosomes, chromosome 3 and chromosome 6, fit relatively poorly. Together this analysis shows that for most chromosomes, the goodness-of-fit between simulated and experimental data (blue) shows similar quantitative agreement as found previously for chromosome 13 (~1.11). These values approach the level of agreement between biological replicates (green), and are substantially lower than the discrepancy with G1 data (orange).

## Supplementary Tables

**Supplementary Table 1. *S. cerevisiae* strains used in this study**

| Strain name | genotype                                                                                                                                                                                                         |
|-------------|------------------------------------------------------------------------------------------------------------------------------------------------------------------------------------------------------------------|
| MJ6         | <i>ho::LYS2<sup>+</sup>, lys2<sup>-</sup>, ura3<sup>-</sup>, arg4-nsp<sup>-</sup>, leu2::hisG<sup>+</sup>, his4X::LEU2<sup>+</sup>, nuc1::LEU2<sup>+</sup></i>                                                   |
| SSY14       | <i>ho::LYS2<sup>+</sup>, lys2<sup>-</sup>, ura3<sup>-</sup>, arg4-nsp<sup>-</sup>, leu2::hisG<sup>+</sup>, his4X::LEU2<sup>+</sup>, nuc1::LEU2<sup>+</sup>, ndt80Δ::LEU2<sup>+</sup></i>                         |
| SSY20       | <i>ho::LYS2<sup>+</sup>, lys2<sup>-</sup>, ura3<sup>-</sup>, arg4-nsp<sup>-</sup>, leu2::hisG<sup>+</sup>, rec8Δ::KanMX4<sup>+</sup>, ndt80Δ::LEU2<sup>+</sup></i>                                               |
| SSY25       | <i>ho::LYS2<sup>+</sup>, lys2<sup>-</sup>, ura3<sup>-</sup>, arg4-nsp<sup>-</sup>, leu2::hisG<sup>+</sup>, his4X::LEU2<sup>+</sup>, nuc1::LEU2<sup>+</sup>, zip1::LEU2<sup>+</sup>, ndt80Δ::LEU2<sup>+</sup></i> |
| SSY49       | <i>ho::LYS2<sup>+</sup>, lys2<sup>-</sup>, ura3<sup>-</sup>, arg4-nsp<sup>-</sup>, leu2::hisG<sup>+</sup>, nuc1::LEU2<sup>+</sup>, his4X::LEU2<sup>+</sup>, hop1::LEU2<sup>+</sup>, ndt80Δ::LEU2<sup>+</sup></i> |
| SSY58       | <i>ho::hisG<sup>+</sup>, lys2<sup>-</sup>, ura3<sup>-</sup>, leu2::hisG<sup>+</sup>, nuc1::LEU2<sup>+</sup>, arg4-nsp<sup>-</sup>, rec8::KanMX<sup>+</sup>, ndt80Δ::LEU2<sup>+</sup></i>                         |

**Supplementary Table 2. Overview of proteins described in this study**

| Protein | Description                                           |
|---------|-------------------------------------------------------|
| Ndt80   | Transcription factor required for exit from pachytene |
| Rec8    | Meiosis-specific kleisin subunit of cohesin           |
| Hop1    | Axial element of the synaptonemal complex             |
| Zip1    | Transverse filament of the synaptonemal complex       |



**Supplementary Table 3. Hi-C Libraries**

| Name                         | Mutations                    | Sample name                  | Valid pairs (M) |
|------------------------------|------------------------------|------------------------------|-----------------|
| <b>Main figures</b>          |                              |                              |                 |
| wt-0h/G1                     |                              | HiC_MJ6_wt_2A_0h             | 14.5            |
| wt-2h                        |                              | HiC_MJ6_wt_2A1_2h            | 27.6            |
| wt-3h                        |                              | HiC_MJ6_wt_2A_3h             | 24.1            |
| wt-4h                        |                              | HiC_MJ6_wt_2A_4h             | 28              |
| wt-5h                        |                              | HiC_MJ6_wt_2A1_5h            | 27.6            |
| wt-6h                        |                              | HiC_MJ6_wt_2A1_6h            | 27.6            |
| wt-8h                        |                              | HiC_MJ6_wt_2A3_8h            | 19              |
| <i>rec8</i> Δ                | <i>rec8</i> Δ <i>ndt80</i> Δ | average                      |                 |
| <i>rec8</i> Δ replica 1      | <i>rec8</i> Δ <i>ndt80</i> Δ | HiC_SSY20_ndt80Drec8D_1A2_8h | 39.3            |
| <i>rec8</i> Δ replica 2      | <i>rec8</i> Δ <i>ndt80</i> Δ | HiC_SSY58_ndt80Drec8D_2A_8h  | 20.2            |
| <i>ndt80</i> Δ               | <i>ndt80</i> Δ               | average, 8h                  |                 |
| G1                           | <i>ndt80</i> Δ               | HiC_SSY14_ndt80D_1A2_0h      | 36              |
| <i>ndt80</i> Δ-4h            | <i>ndt80</i> Δ               | HiC_SSY14_ndt80D_1A_4h       | 11.9            |
| <i>ndt80</i> Δ replica 1     | <i>ndt80</i> Δ               | HiC_SSY14_ndt80D_1A1_8h      | 22.9            |
| <i>ndt80</i> Δ replica 2     | <i>ndt80</i> Δ               | HiC_SSY14_ndt80D_2A2_8h      | 37              |
| <i>zip1</i> Δ                | <i>zip1</i> Δ <i>ndt80</i> Δ | average                      |                 |
| <i>zip1</i> Δ replica 1      | <i>zip1</i> Δ <i>ndt80</i> Δ | HiC_SSY25_ndt80Dzip1D_1B2_8h | 22.7            |
| <i>zip1</i> Δ replica 2      | <i>zip1</i> Δ <i>ndt80</i> Δ | HiC_SSY25_ndt80Dzip1D_2A_8h  | 28.6            |
| <i>hop1</i> Δ                | <i>hop1</i> Δ <i>ndt80</i> Δ | hop1 <i>ndt80</i>            |                 |
| <i>hop1</i> Δ replica1       | <i>hop1</i> Δ <i>ndt80</i> Δ | HiC_SSY49_ndt80Dhop1D_1A_8h  | 32.8            |
| <i>wt mitotic replica 1</i>  |                              | HiC_MJ6_wt_4A1_noco          | 51.6            |
| <i>wt mitotic replica 2</i>  |                              | HiC_MJ6_wt_5A1_noco          | 82.3            |
| <b>Supplementary Figures</b> |                              |                              |                 |
| wt-2h                        |                              | HiC_MJ6_wt_3A_2h             | 22.5            |
| wt-3h                        |                              | HiC_MJ6_wt_3A_3h             | 19.8            |
| wt-4h                        |                              | HiC_MJ6_wt_3A_4h             | 16.7            |
| wt-6h                        |                              | HiC_MJ6_wt_3A_6h             | 37.6            |
